# Supplementary material for: Specific transport of 3‐fluoro‐l‐α‐methyl‐tyrosine by LAT1 explains its specificity to malignant tumors in imaging
Source: PubMed Central journal article supplement — Cancer Sci. 2016 Feb 19;107(3):347–52. doi: 10.1111/cas.12878 (PMC4814262; doi:10.1111/cas.12878), 2016-02-19
Supplement: CAS-107-347-s001.pdf [file CAS-107-347-s001.pdf]

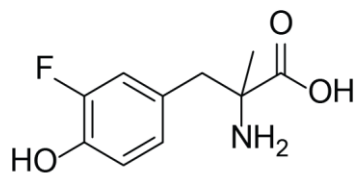

**3-Fluoro-L- $\alpha$ -methyl-tyrosine (FAMT)**

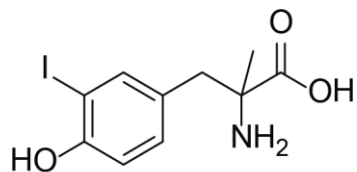

**3-Iodo-L- $\alpha$ -methyl-tyrosine (IMT)**

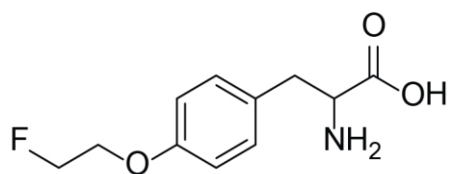

**O-(2-Fluoroethyl)-L-tyrosine (FET)**

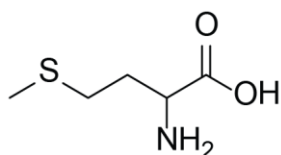

**L-Methionine (Met)**

**Fig. S1 Chemical structures of FAMT, IMT, FET and Met.**
