# Supplementary material for: Specific transport of 3‐fluoro‐l‐α‐methyl‐tyrosine by LAT1 explains its specificity to malignant tumors in imaging
Source: PubMed Central journal article supplement — Cancer Sci. 2016 Feb 19;107(3):347–52. doi: 10.1111/cas.12878 (PMC4814262; doi:10.1111/cas.12878), 2016-02-19
Supplement: CAS-107-347-s002.pdf [file CAS-107-347-s002.pdf]

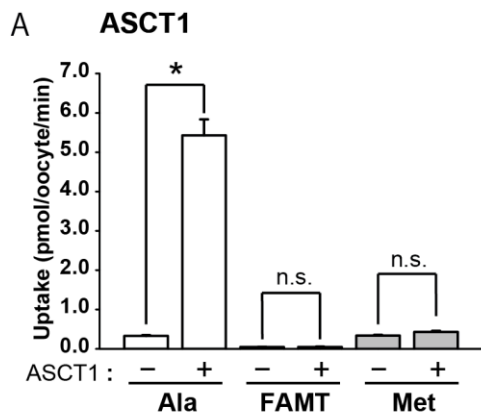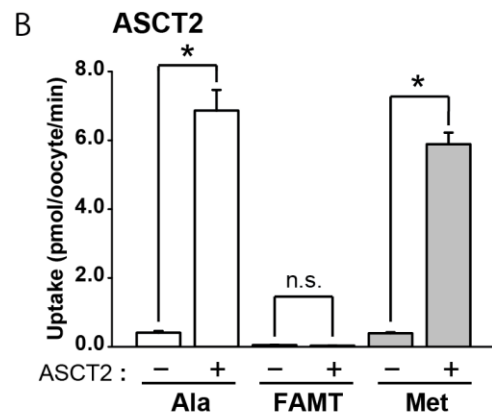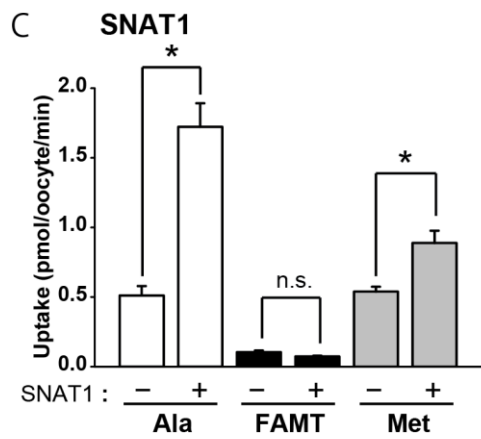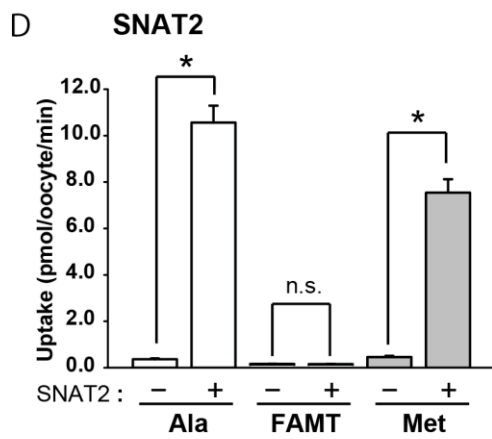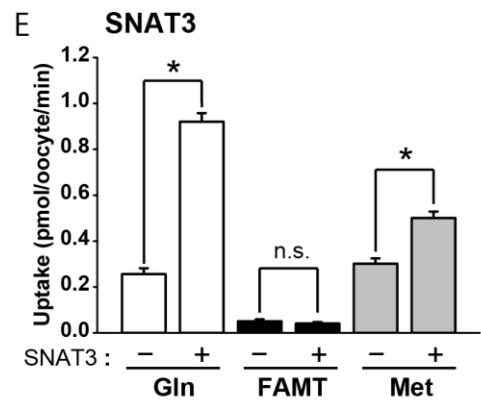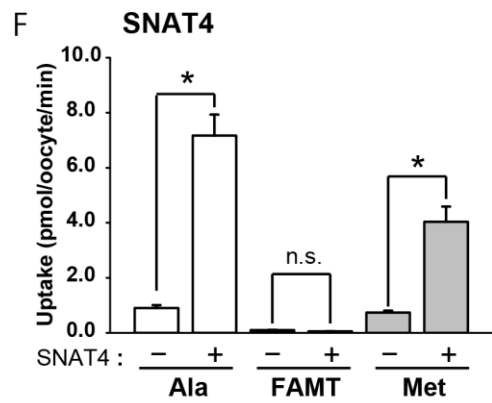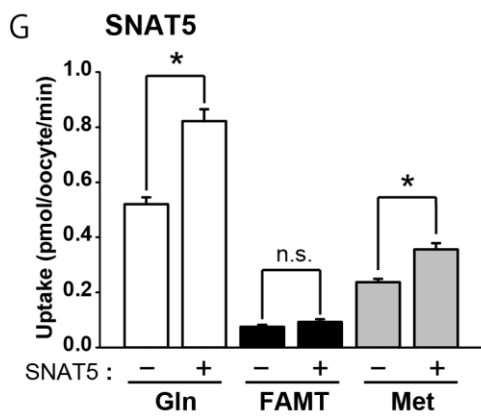

**Fig. S2 [<sup>14</sup>C]FAMT transport by amino acid transporters for small neutral amino acids.**

The uptakes of 50 μM [<sup>14</sup>C]FAMT (FAMT), L-[<sup>14</sup>C]methionine (Met) and a typical substrate L-[<sup>14</sup>C]alanine (Ala) for ASCT1 (*A*), ASCT2 (*B*), SNAT1 (*C*), SNAT2 (*D*) and SNAT4 (*F*), and the uptakes of 50 μM [<sup>14</sup>C]FAMT (FAMT) and L-[<sup>14</sup>C]methionine (Met) and a typical substrate L-[<sup>14</sup>C]glutamine (Gln) for SNAT3 (*E*) and SNAT5 (*G*) were measured on the control oocytes (“-”) and the oocytes expressing each transporter (“+”) in ND96 solution. The uptakes were measured for 30 min for SNAT5 and for 15 min for the others. The uptake rates were expressed as mean ± SEM (n = 5–10). \*, *p* < 0.05; n.s., not significant.
