# Supplementary material for: Specific transport of 3‐fluoro‐l‐α‐methyl‐tyrosine by LAT1 explains its specificity to malignant tumors in imaging
Source: PubMed Central journal article supplement — Cancer Sci. 2016 Feb 19;107(3):347–52. doi: 10.1111/cas.12878 (PMC4814262; doi:10.1111/cas.12878), 2016-02-19
Supplement: CAS-107-347-s003.pdf [file CAS-107-347-s003.pdf]

**Table S1**Human cDNAs and their constructs for *Xenopus* oocytes expression

| Gene name       | Protein name        | Expression vector | Restriction enzyme site <sup>1</sup> | Enzyme for linearization | RNA polymerase | Genebank accession no.  | Reference <sup>4</sup> |
|-----------------|---------------------|-------------------|--------------------------------------|--------------------------|----------------|-------------------------|------------------------|
| <i>SLC7A5</i>   | LAT1                | pcDNA40           | TOPO cloning <sup>2</sup>            | AscI                     | T7             | AB018009.1              | a                      |
| <i>SLC7A8</i>   | LAT2                | pcDNA3.1(+)       | NotI                                 | XhoI                     | T7             | AB037669.1              | b                      |
| <i>SLC43A1</i>  | LAT3                | pcDNA3.1(+)       | EcoRI, NotI                          | XhoI                     | T7             | AB103033.1              | c                      |
| <i>SLC43A2</i>  | LAT4                | pcDNA3.1(+)       | EcoRI, NotI                          | Apal                     | T7             | BC027923.1              | d                      |
| <i>SLC16A10</i> | TAT1                | pcDNA3.1(-)       | NotI, EcoRI                          | EcoRI                    | T7             | AB057445.1              | e                      |
| <i>SLC6A19</i>  | B <sup>0</sup> AT1  | pcDNA3.1(+)       | EcoRI, NotI                          | Apal                     | T7             | AK290811.1              | f                      |
| <i>SLC6A14</i>  | ATB <sup>0,+</sup>  | pcDNA3.1(+)       | EcoRI, NotI                          | Apal                     | T7             | AK313390.1 <sup>3</sup> | g                      |
| <i>SLC7A7</i>   | y <sup>+</sup> LAT1 | pcDNA3.1(+)       | HindIII, XbaI                        | XbaI                     | T7             | AB020532.1              | h                      |
| <i>SLC7A6</i>   | y <sup>+</sup> LAT2 | pcDNA3.1(+)       | BamHI, XhoI                          | XhoI                     | T7             | NM_003983.5             | i                      |
| <i>SLC1A4</i>   | ASCT1               | pSPORT1           | Sall                                 | HindIII                  | T7             | AB026689.1              | j                      |
| <i>SLC1A5</i>   | ASCT2               | pBluescript       | NotI                                 | HindIII                  | T3             | NM_005628.2             | k                      |
| <i>SLC38A1</i>  | SNAT1               | pCMV-SPORT6       | Sall, NotI                           | XhoI                     | SP6            | BC010620.1              | l                      |
| <i>SLC38A2</i>  | SNAT2               | pCMV-SPORT6       | Sall, NotI                           | XhoI                     | SP6            | BC040342.1              | m                      |
| <i>SLC38A3</i>  | SNAT3               | pCMV-SPORT6       | EcoRV, NotI                          | XhoI                     | SP6            | BC042875.1              | n                      |
| <i>SLC38A4</i>  | SNAT4               | pcDNA3.1(+)       | NotI, XhoI                           | XhoI                     | T7             | AB055003.1              | o                      |
| <i>SLC38A5</i>  | SNAT5               | pSPORT1           | EcoRI                                | AgeI                     | SP6            | NM_033518.3             | p                      |
| <i>SLC3A2</i>   | 4F2hc               | pcDNA3.1(+)       | HindIII, BamHI                       | XmaI                     | T7             | AB018010.1              | q                      |
| <i>TMEM27</i>   | Collectrin          | pcDNA3.1(+)       | EcoRI, NotI                          | Apal                     | T7             | NM_020665.5             | r                      |
| <i>SLC3A1</i>   | rBAT                | pcDNA3.1(+)       | NotI, XhoI                           | XhoI                     | T7             | AB033549.1              | s                      |

<sup>1</sup> Restriction enzyme sites used for subcloning cDNAs into each expression vector.

<sup>2</sup> LAT1 was cloned into the pcDNA40 vector by TOPO cloning.

<sup>3</sup> cDNA clone corresponding to AK313390.1 contained single nucleotide alteration compared with a functionally characterized sequence (Sloan J L, Mager S. *J Biol Chem.* 1999; 274: 23740-23745). Therefore, "G" at the nucleotide number 1652 of AK313390 has been converted to "A" by site-directed mutagenesis, so that Val-507 is changed to Ile to obtain the functionally characterized ATB<sup>0,+</sup>.

<sup>4</sup> The references for each transporter are as follows:

- a, Yanagida O, et al., *Biochim Biophys Acta.* 2001; 1514: 291-302.
- b, Pineda M, et al., *J Biol Chem.* 1999; 274: 19738-19744.
- c, Babu E, et al., *J Biol Chem.* 2003; 278: 43838-43845.

d, Bodoy S, et al., J Biol Chem. 2005; 280: 12002-12011.  
e, Kim DK, et al., Genomics. 2002; 79: 95-103.  
f, Kleta R, et al., Nat Genet. 2004; 36: 999-1002.  
g, Sloan JL, et al., J Biol Chem. 1999; 274: 23740-23745.  
h, Torrents D, et al., J Biol Chem. 1998; 273: 32437-32445.  
i, Bröer A, et al., Biochem J. 2000; 349: 787-795.  
j, Arriza JL, et al., J Biol Chem. 1993; 268: 15329-15332.  
k, Kekuda R, et al., J Biol Chem. 1996; 271: 18657-18661.  
l, Wang H, et al., Biochem Biophys Res Commun. 2000; 273: 1175-1179.  
m, Hatanaka T, et al., Biochim Biophys Acta. 2000; 1467: 1-6.  
n, Fei YJ, et al., J Biol Chem. 2000; 275: 23707-23717.  
o, Hatanaka T., Biochim Biophys Acta. 2001; 1510: 10-17.  
p, Nakanishi T, et al., Biochem Biophys Res Commun. 2001; 281: 1343-1348.  
q, Kanai Y, et al., J Biol Chem. 1998; 273: 23629-23632.  
r, Danilczyk U, et al., Nature. 2006; 444: 1088-1091.  
s, Lee WS, et al., J Clin Invest. 1993; 91: 1959-1963.
